# Supplementary material for: Mesenchymal Stem Cells from Human Umbilical Cord Express Preferentially Secreted Factors Related to Neuroprotection, Neurogenesis, and Angiogenesis
Source: PubMed Central journal article supplement (PMC3749979; doi:10.1371/journal.pone.0072604), 2013-08-22
Supplement: pone.0072604.s001.pdf [file pone.0072604.s001.pdf]

**Table S1. Primers used in real-time PCR experiments.**

| <b>Genes</b>  | <b>Forward primer</b>     | <b>Reverse primer</b>    | <b>Amplicon</b> |
|---------------|---------------------------|--------------------------|-----------------|
| <b>SOX11</b>  | CgCgggCAAgACggTCAAgt      | CCTCCTCgTCCggCTCCTgT     | 104             |
| <b>PITX1</b>  | CgAgTCgTCTgACACggAg       | TTCTTCTTggCTgggTCgTC     | 117             |
| <b>NRP2</b>   | ggCTggACCCCAACTTg         | TggAAATCgCTCCCTgTgTT     | 100             |
| <b>FOXF1</b>  | CAGCCgTATCTgCACCAgAA      | ACTCCTTTCggTCACACATgCT   | 100             |
| <b>FLT1</b>   | CCATggTCAgCTACTgggAC      | CTTgCATgATgTgCTgggTg     | 135             |
| <b>CDH2</b>   | CCACgCTgAgCCCCAgTATC      | CCCCAgTCgTCAggTAATCA     | 232             |
| <b>PGF</b>    | AATgTCACCATgCAGCTCCT      | ACCTTTCggCTTCATCTTCT     | 124             |
| <b>ANGPT1</b> | gggAACCGAgCCTATTCACA      | gCTgCTCTgTTTTCTgCTg      | 108             |
| <b>CXCL2</b>  | ACCgAAgTCATAgCCACACTCA    | TCAggAACAgCCACCAATAAgC   | 150             |
| <b>HBEGF</b>  | AgTCCgTgACTTgCAAgAgg      | TTCTTTTCCCgTgCTCCTCC     | 104             |
| <b>CXCL5</b>  | CAGACCACgCAAggAgTTCATC    | TCTTCAgggAggCTACCACTTC   | 100             |
| <b>NTF3</b>   | CggATgCCATggTTACTTTTg     | CCTTggATgCCACggAgATA     | 100             |
| <b>MDK</b>    | TACAATgCTCAGTgCCAaggA     | CTTggCgTCTAgTCCTTTC      | 107             |
| <b>EGF</b>    | CTCCTCCAAgTgCATCAACA      | gCCTCCCTCTgTATTTgTgC     | 154             |
| <b>FGF9</b>   | ACACTggAAggCgATACTATgTTgC | TACTTTgTCggggTCCACTggTCT | 122             |
| <b>GAPDH</b>  | ggAgTCCACTggCgTCTTCA      | TggTTCACACCCATgACgAA     | 123             |
